# Supplementary material for: Intervention Programme Based on Self-Determination Theory to Promote Extracurricular Physical Activity through Physical Education in Primary School: A Study Protocol
Source: MDPI journal article supplement (doi:10.3390/children10030504), 2023-03-03
Supplement: s1 [file s1]

## Supplementary material

Table S1. Check List of Need Support Behaviours

| The Physical Education teacher...                                                                                                         | YES | NO | Remarks |
|-------------------------------------------------------------------------------------------------------------------------------------------|-----|----|---------|
| 1. Encourages the autonomous practice of physical and sporting activities in their free time.                                             |     |    |         |
| 2. Encourages and gives positive feedback when pupils do physical activities and sports outside school.                                   |     |    |         |
| 3. Encourages pupils to do physical and sporting activities with family and friends in their free time.                                   |     |    |         |
| 4. Offers novel options for after-school physical and sporting activities.                                                                |     |    |         |
| 5. Cares about, listens to and gives advice to pupils about physical and sporting activities undertaken independently in their free time. |     |    |         |
| 6. Shows confidence in the pupils' ability to do physical and sporting activities in their free time.                                     |     |    |         |
| 7. Encourages sharing with the class the experiences of physical and sporting activities carried out in company.                          |     |    |         |
| 8. Introduces new physical and sporting activities to be undertaken in pupils' free time.                                                 |     |    |         |
| General remarks:                                                                                                                          |     |    |         |
